# Supplementary material for: Can F-18 FDG PET/CT Metabolic Parameters Predict STAS in Non-Small Cell Lung Cancer Patients?
Source: Research Square preprint supplement (doi:10.21203/rs.3.rs-8065101/v1), 2025-12-05
Supplement: Supplementary file 1 [file 4f2cf2e2457402846632a975.docx]

| STAS negative  (n=47) | | | | STAS positive  (n=61) | | |
| --- | --- | --- | --- | --- | --- | --- |
| Age | 45-86 (mean=66) |  |  | 45-87(mean=67) |
| Gender   - Male - Female   Operation   - Wedge - Lobectomy - Pneumonectomy | 38  9  22  21  4 |  |  | 48  13  25  33  3 |  |  |
| Variables | (min-max) | (mean) | (median) | (min-max) | (mean) | (median) |
| Tumor diameter  SUVmax  SUVmean  MTV (%42 threshold)  TLG (%42 threshold)  MTVmax  TLGmax  PeritumoralMTV  PeritumoralTLG | 0.6-11  1.8-29.1  0.9-11  0.5-292  1.7-3475  1.0 – 464  2.0–4450  0.2-172  0.3-974 | 2.7  11.9  4.93  15.5  164.2  31.2  245.7  15.74  81.5 | 2  11.3  4.41  4.6  18.3  8.8  25.9  4.1  9.6 | 0.3-8  3.6-36  1.9-11.5  0.7-137  3-1685  1.4 – 319  4.9–2693  0.6-182  1.4-1007 | 2.9  14.8  5.76  12.1  131.4  27.7  207.6  15.71  78.5 | 2.9  12.1  4.8  4.4  21  8.2  37.5  4.4  16.2 |

**Table 1.** Clinicopathological characteristics stratified by tumor spread through air space
